# Supplementary material
Source: Research Square preprint supplement (doi:10.21203/rs.3.rs-9403650/v1)
Supplement: Supplementary file 1 [file e1cf48b49029e435d398a7b8.docx]

**Supplementary Figures and Figure legends**


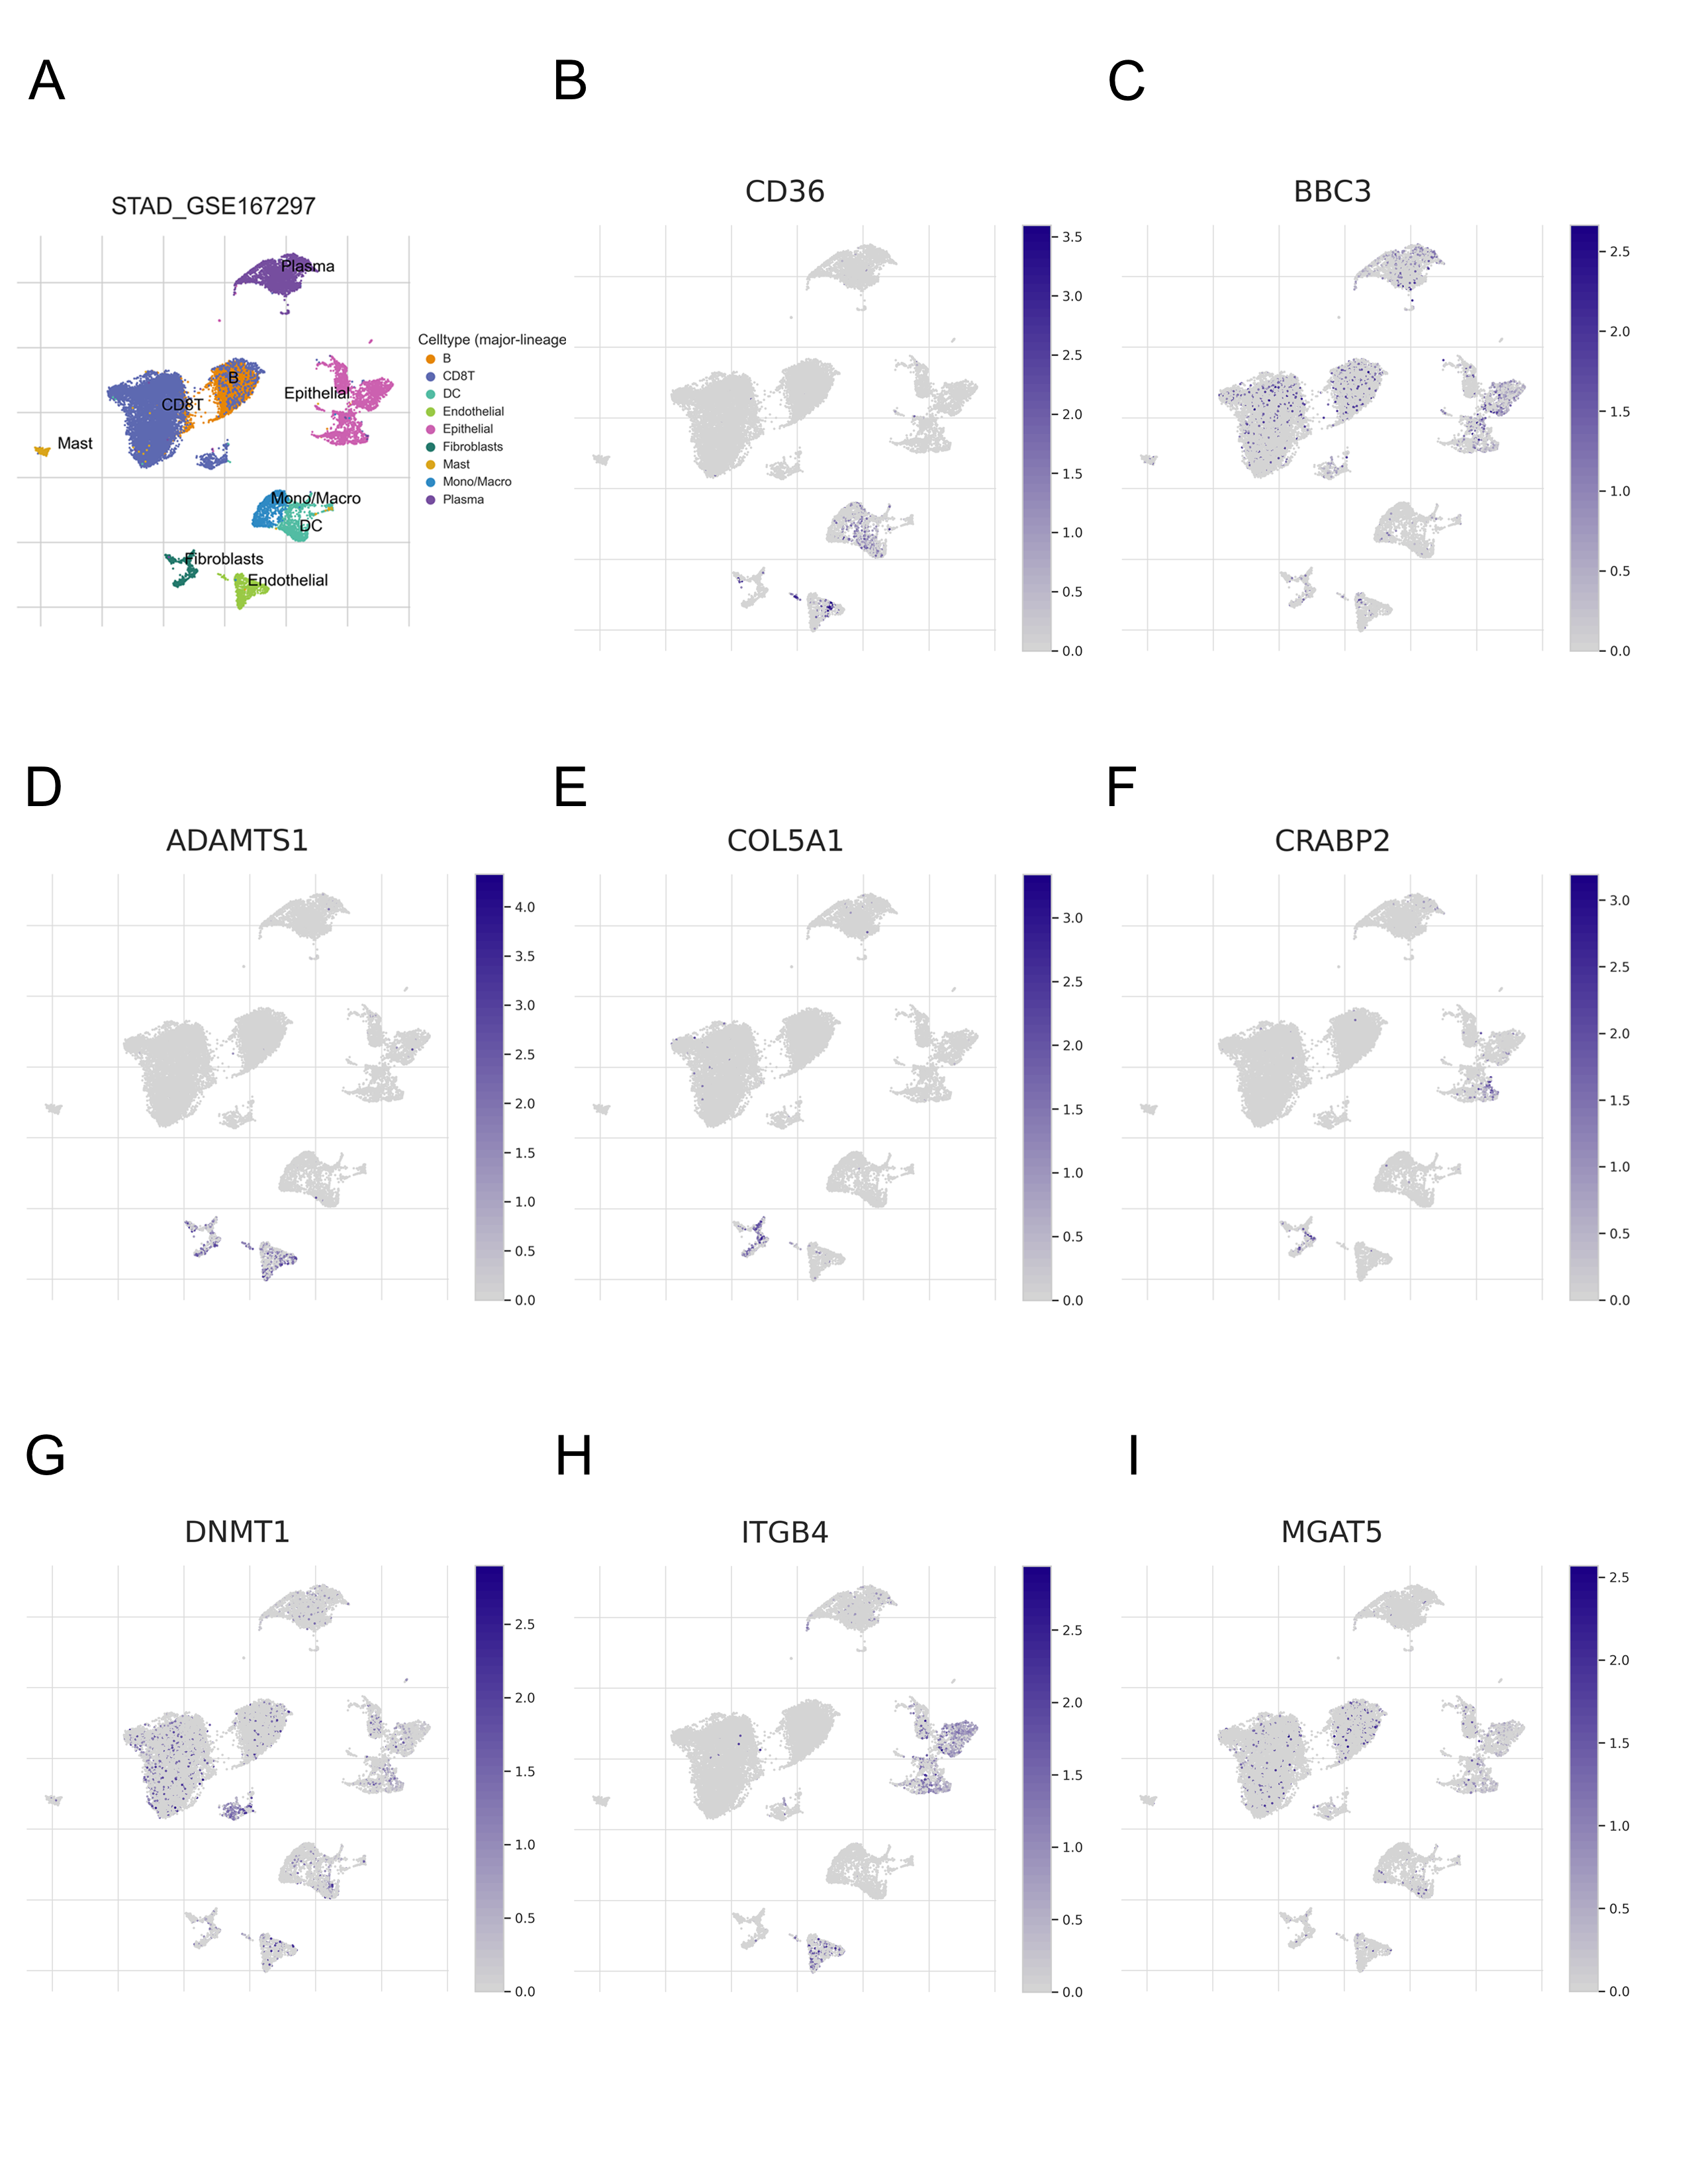
 **Supplementary Figure 1. Validation of the risk signature gene distribution in an independent scRNA-seq cohort. (A)** UMAP plot visualizing the major cell lineages in the validation dataset (GSE167297), including epithelial cells, fibroblasts, endothelial cells, and immune subsets. **(B-I)** Feature plots showing the expression of the 8 signature genes：(B) CD36, (C) BBC3, (D) ADAMTS1, (E) COL5A1, (F) CRABP2, (G) DNMT1, (H) ITGB4, and (I) MGAT5.


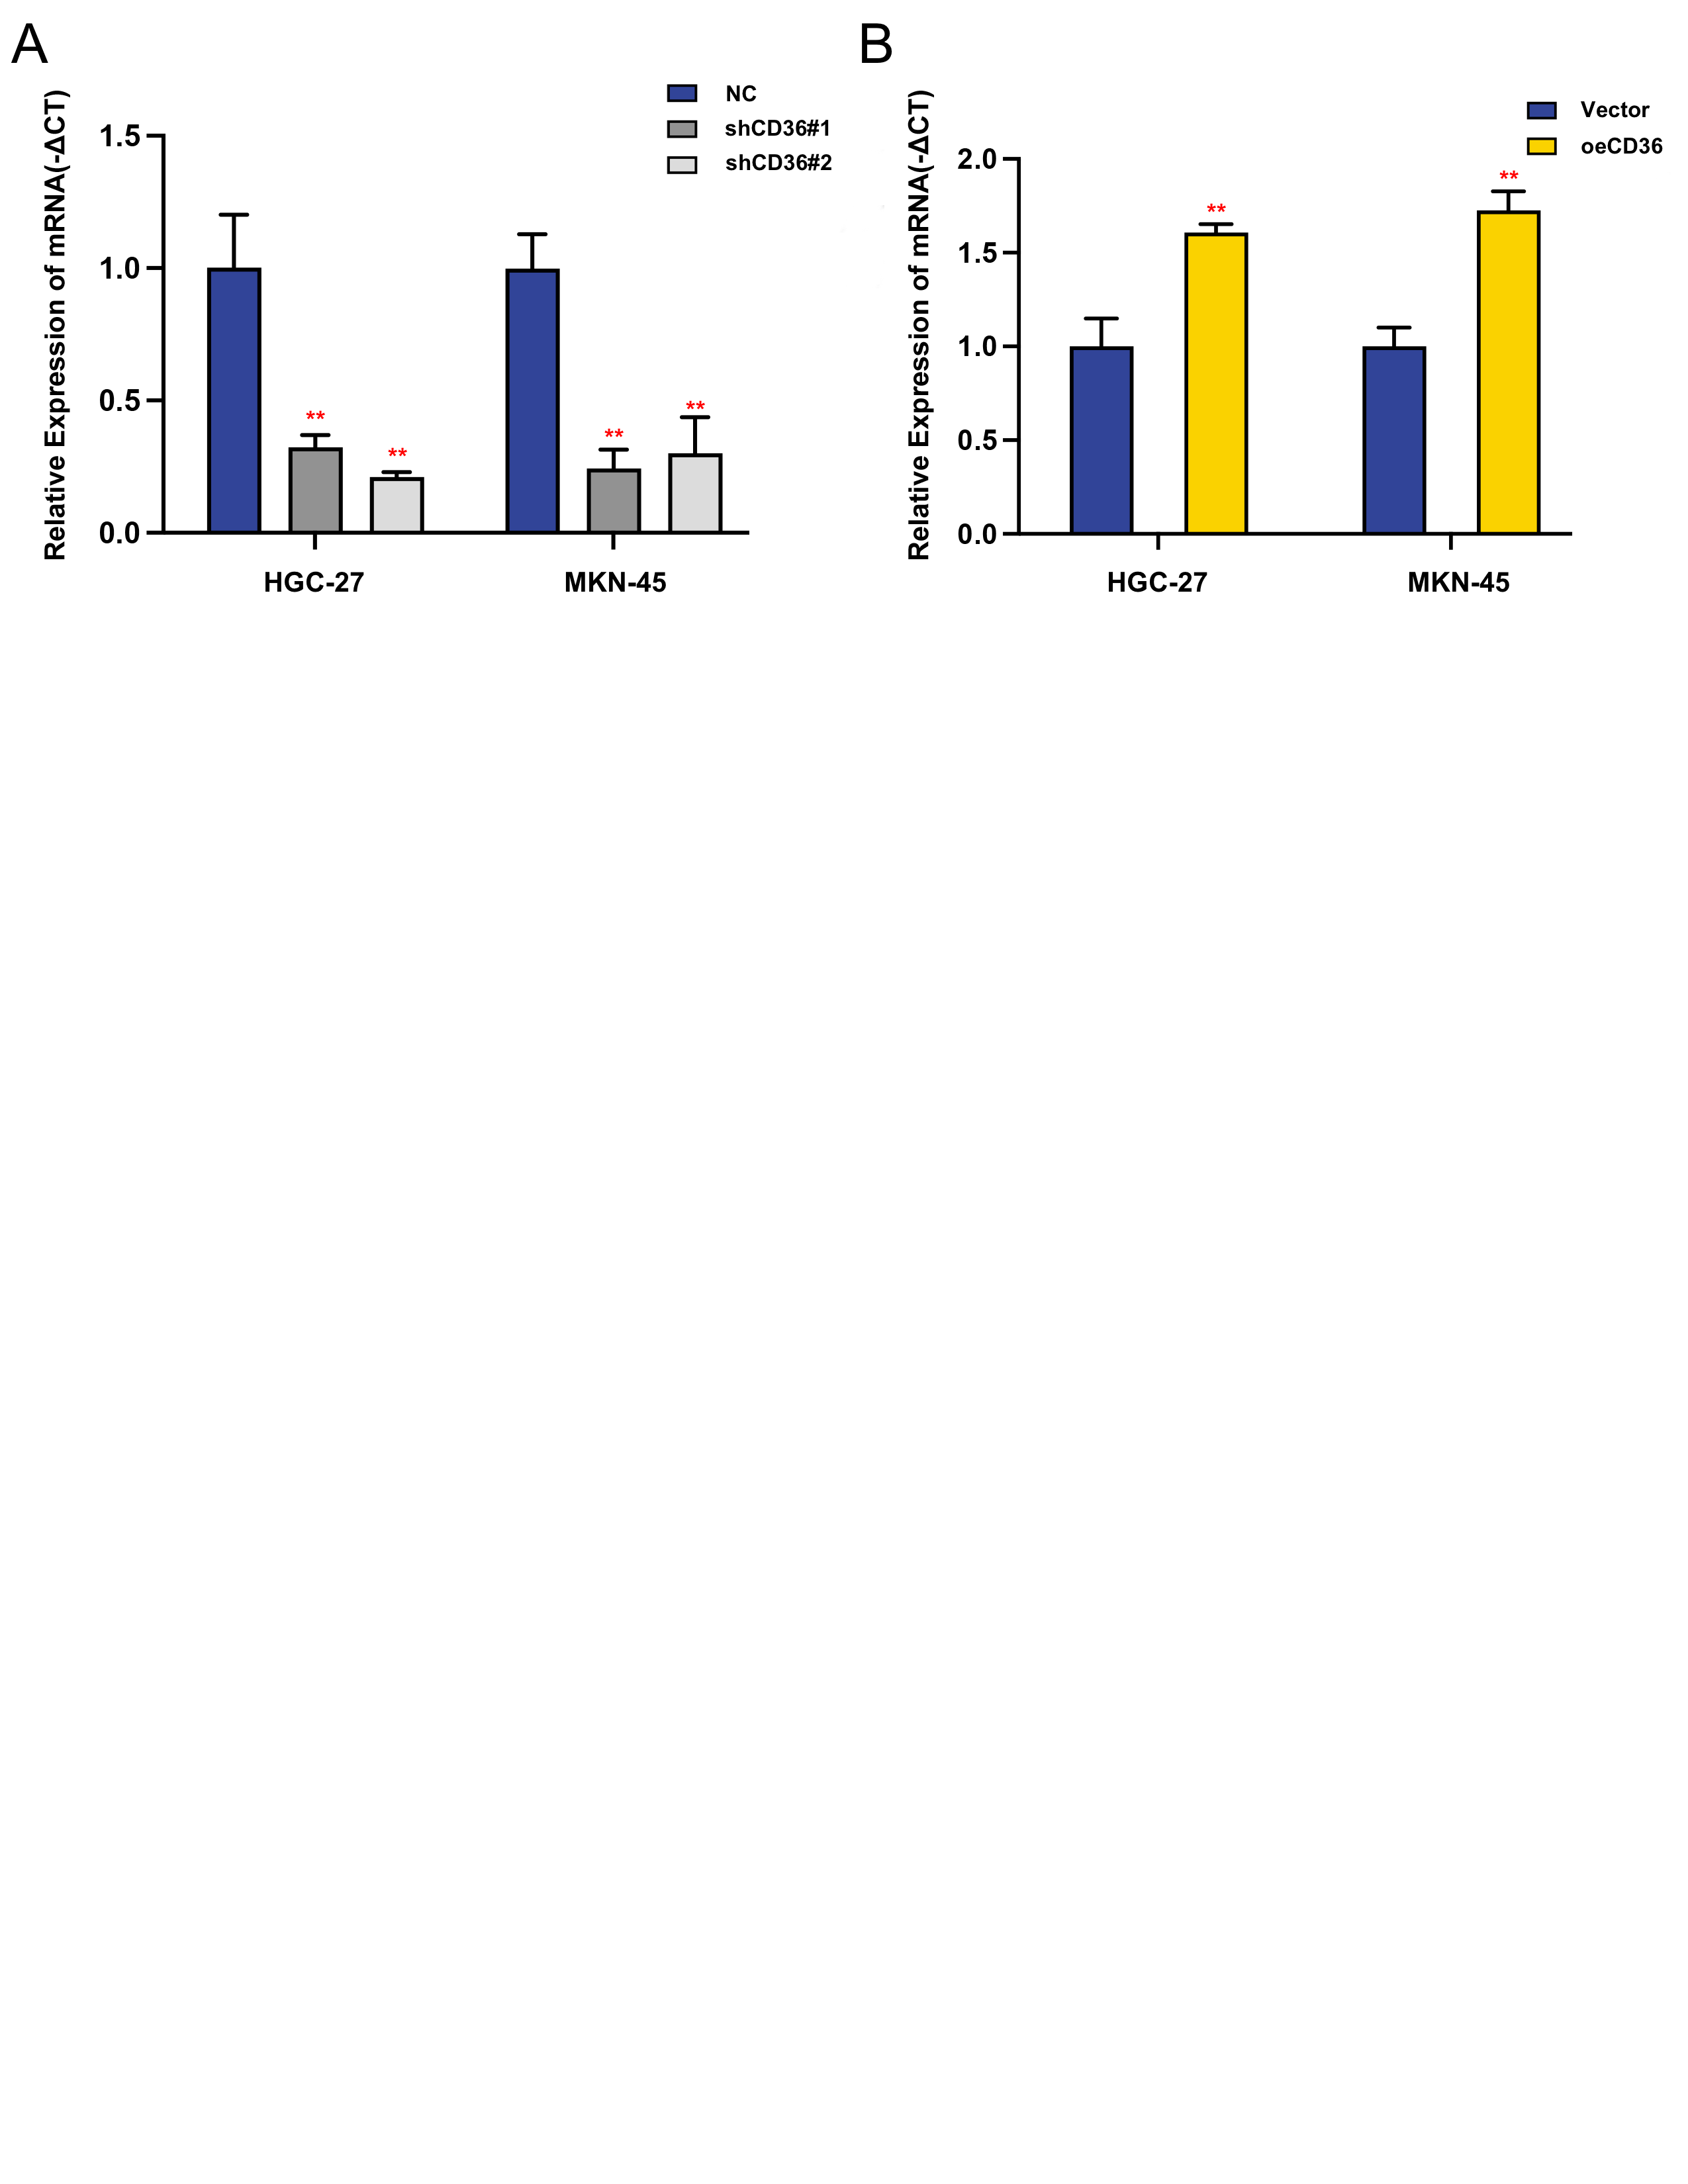
 **Supplementary Figure 2. Verification of CD36 knockdown and overexpression efficiency at the mRNA level.** qRT-PCR analysis of CD36 relative mRNA expression in HGC-27 and MKN-45 cells.
